# Supplementary material for: FLRT2 prevents endothelial cell senescence and vascular aging by regulating the ITGB4/mTORC2/p53 signaling pathway
Source: PubMed Central journal article supplement (PMC11128196; doi:10.1172/jci.insight.172678), 2024-04-08

# Full unedited gel for Figure 1.

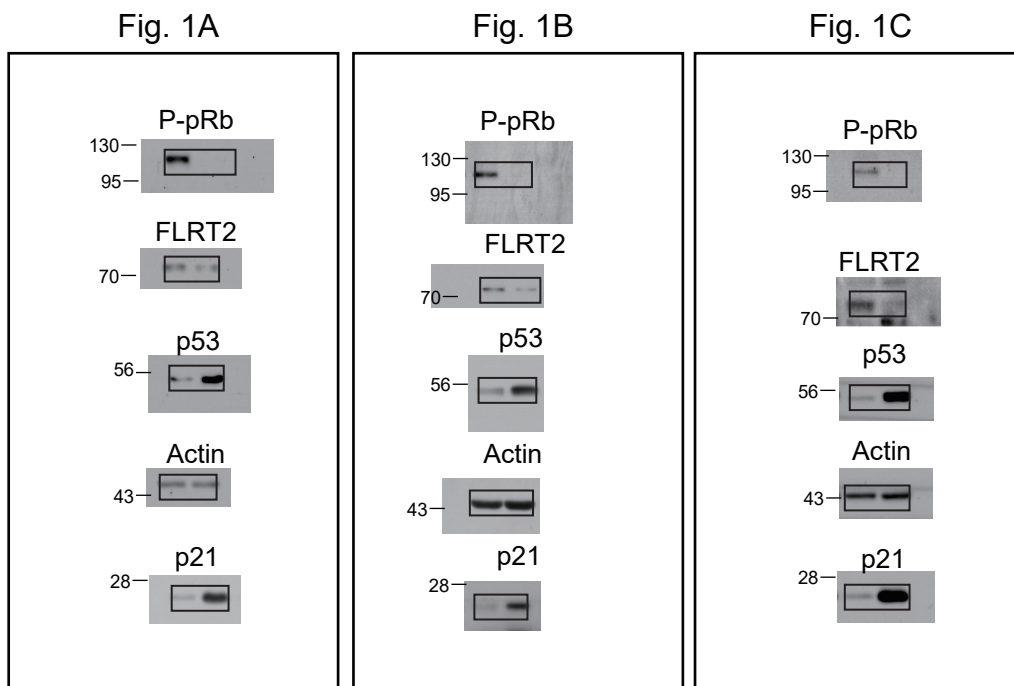

Fig. 1D

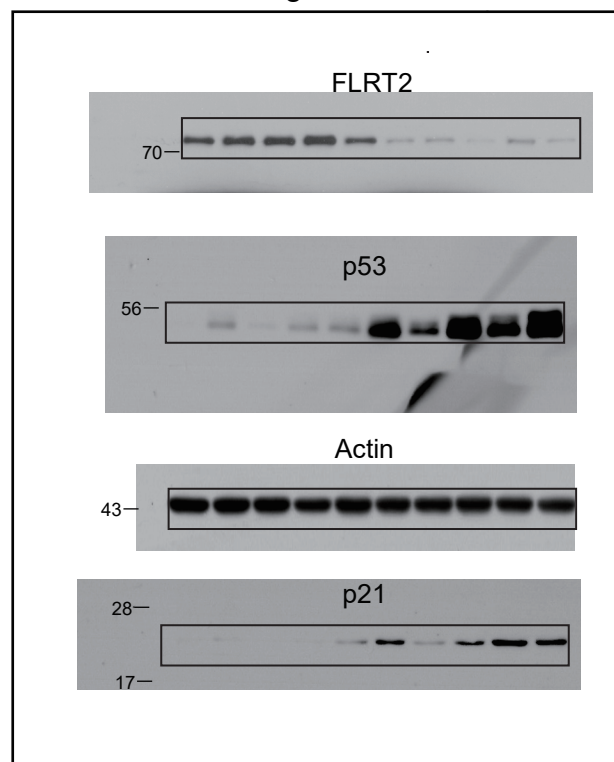

# Full unedited gel for Figure 2.

Fig. 2B

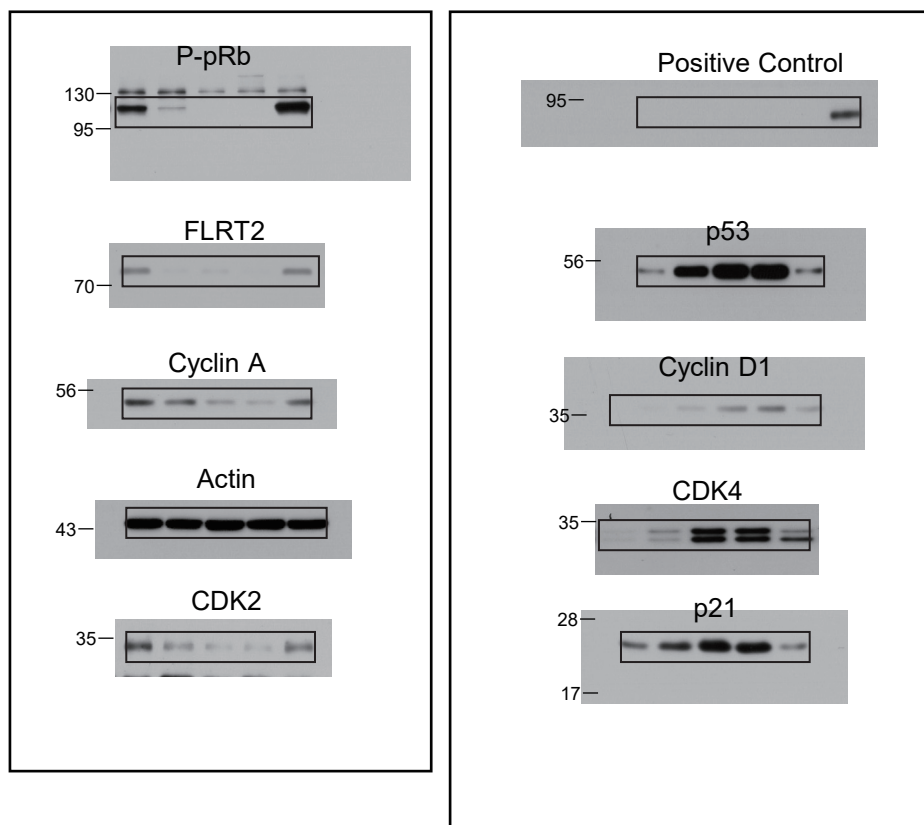

Full unedited gel for Figure 2.

Fig. 2F

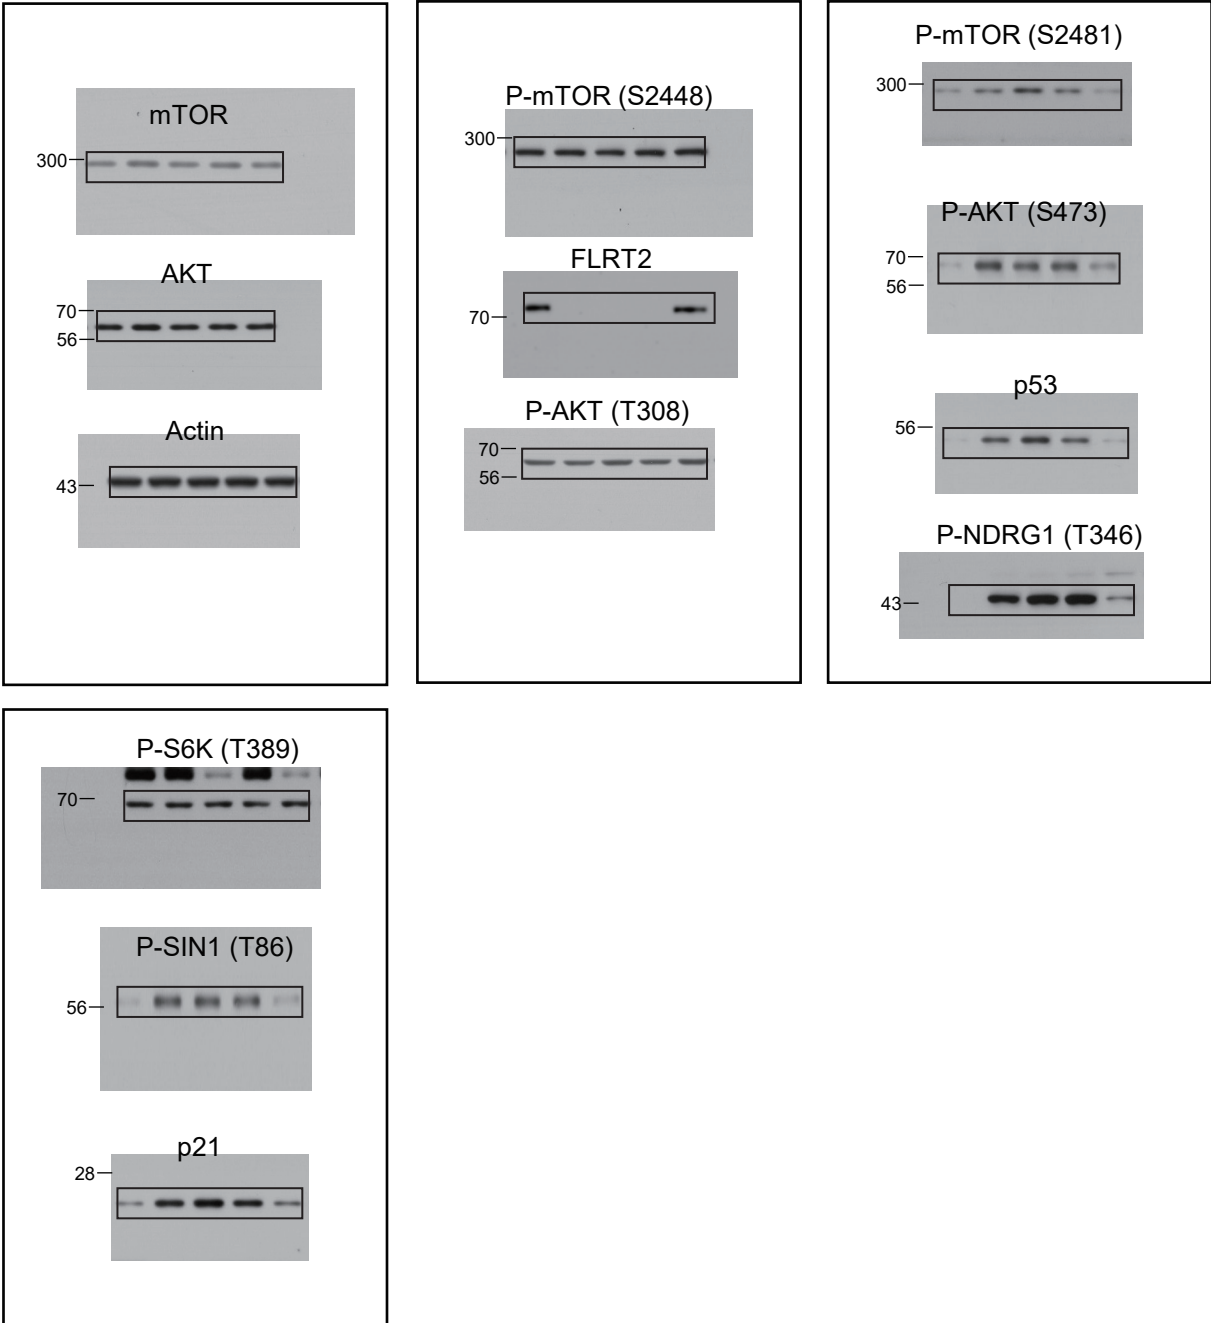

# Full unedited gel for Figure 2.

Fig. 2G

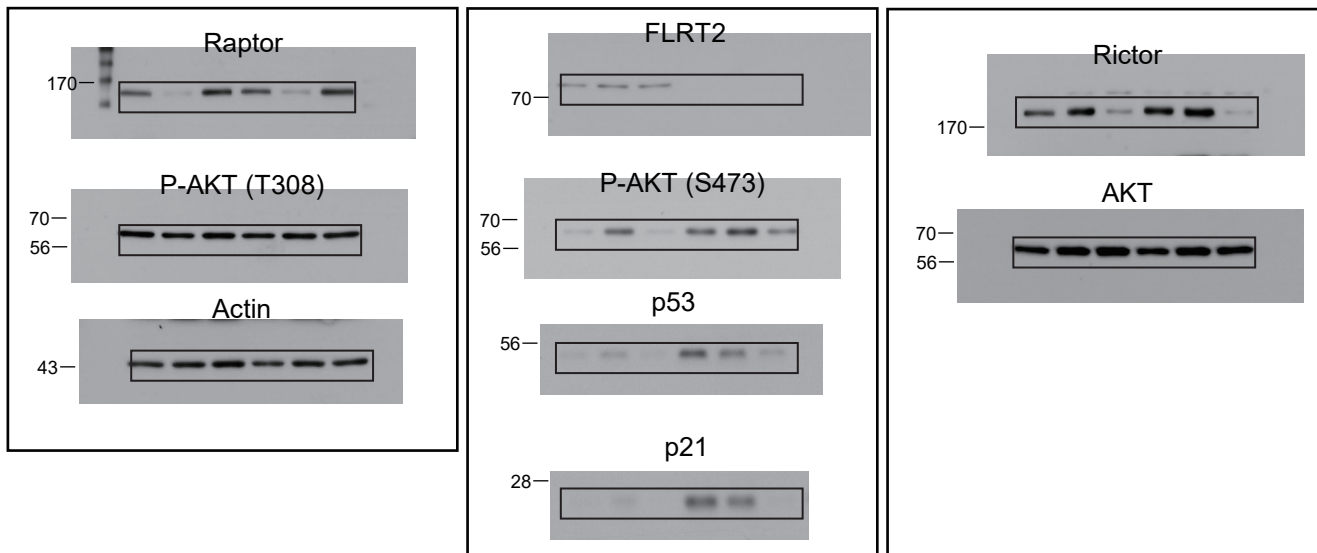

Fig. 2I

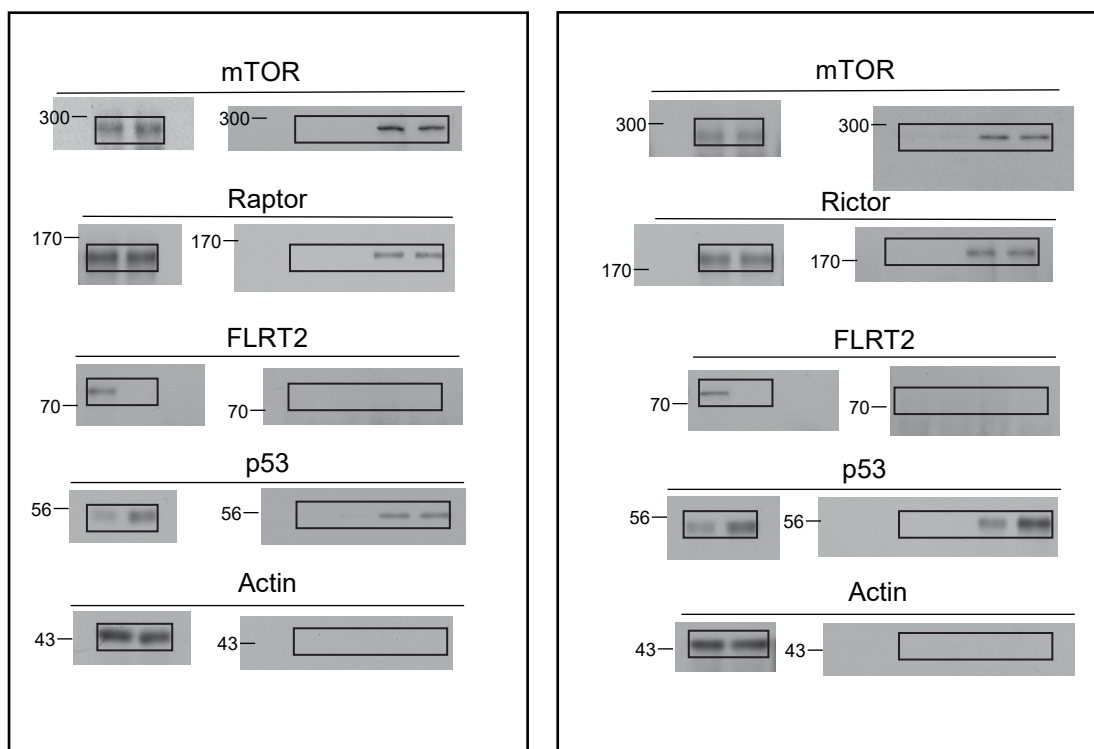



Full unedited gel for Figure 3.

Fig. 3A

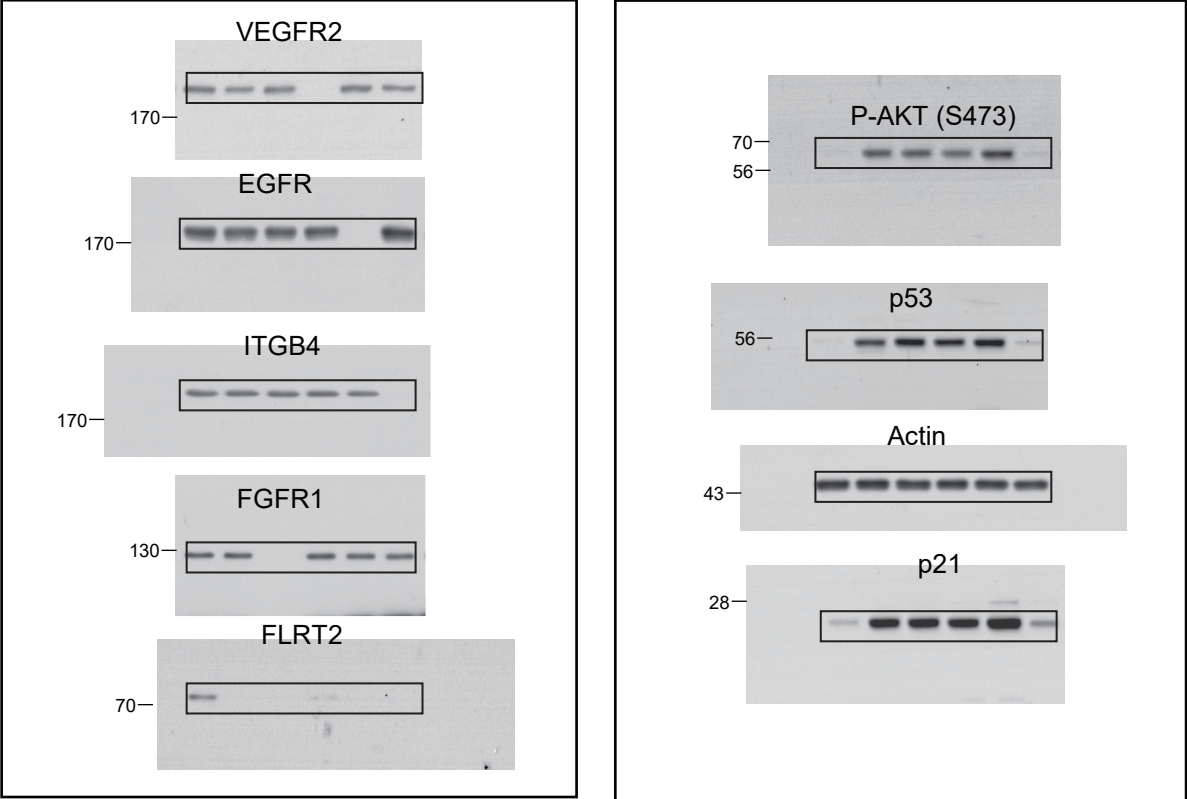

Fig. 3B

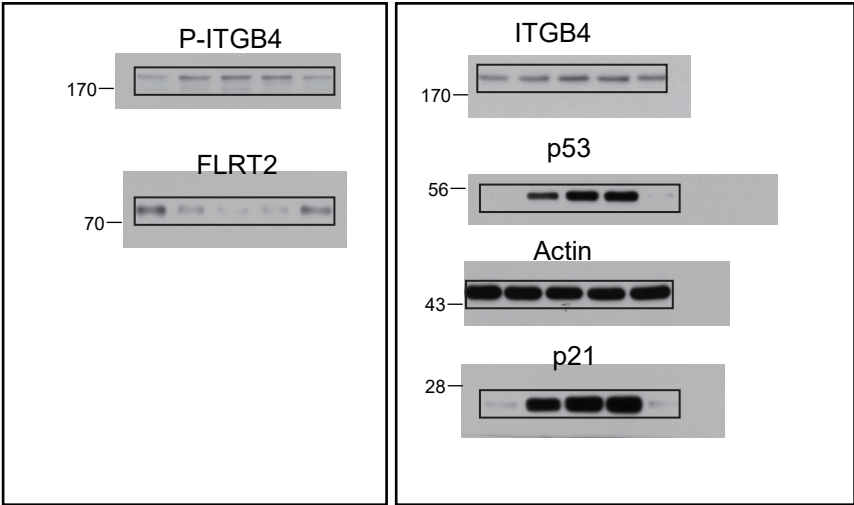

Full unedited gel for Figure 3.

Fig. 3D

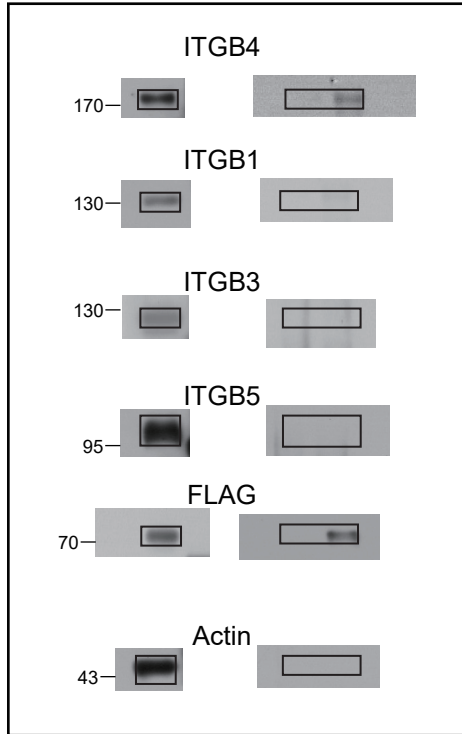

Fig. 3G

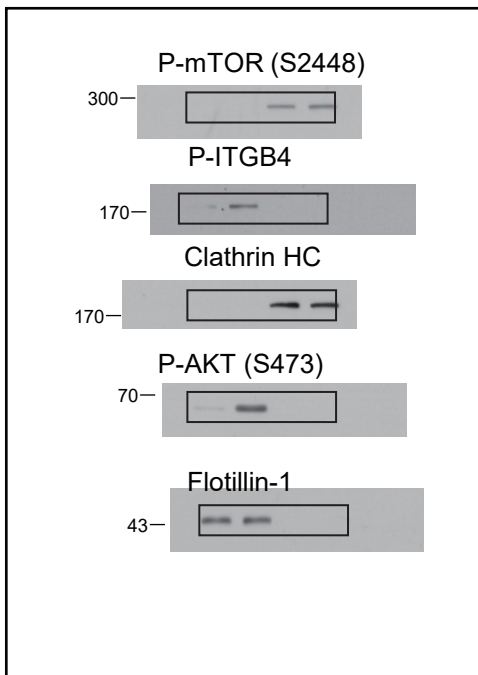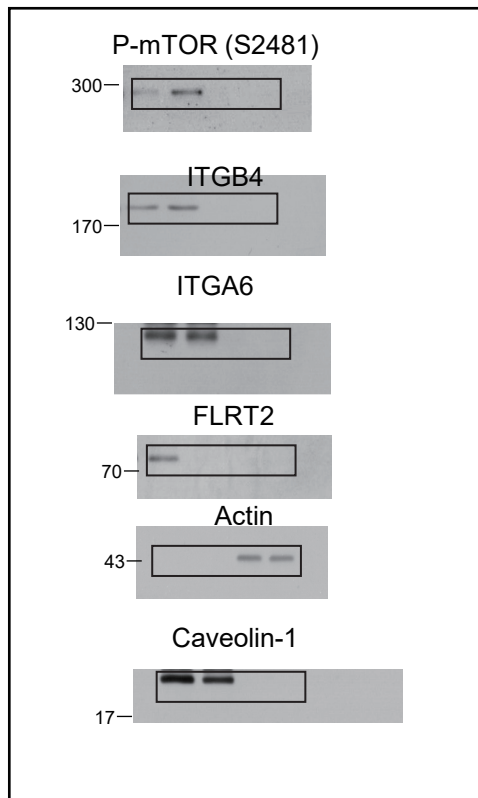

Full unedited gel for Figure 4.

Fig. 4A

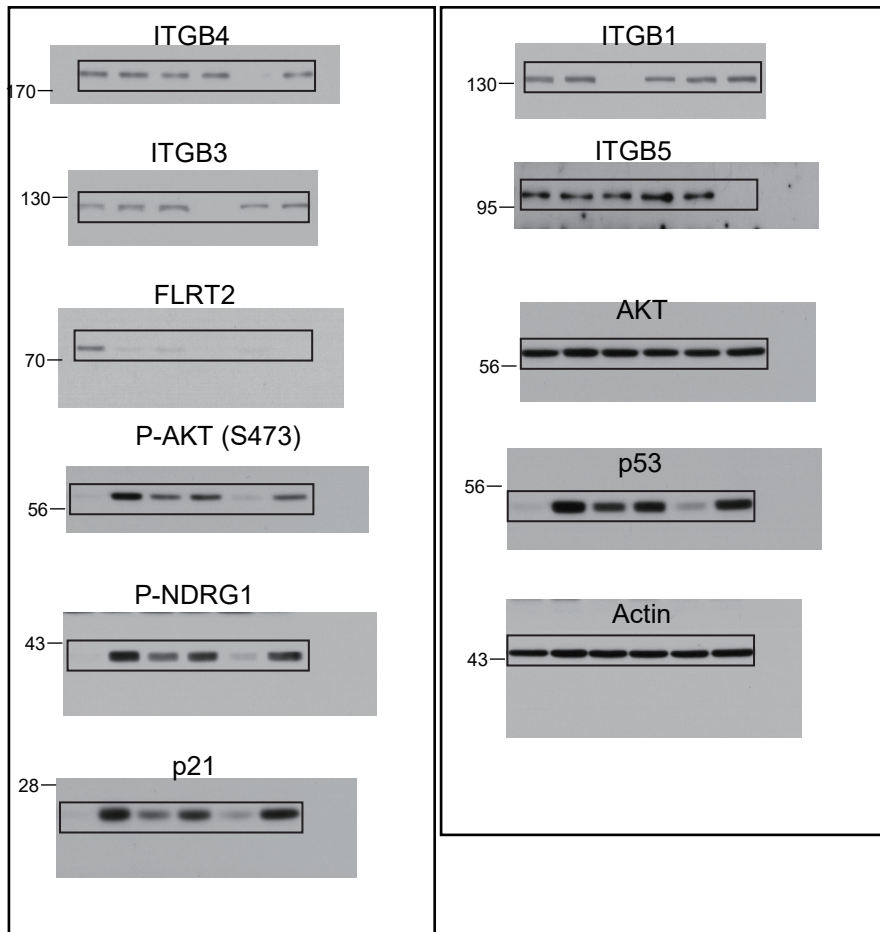

Fig. 4D

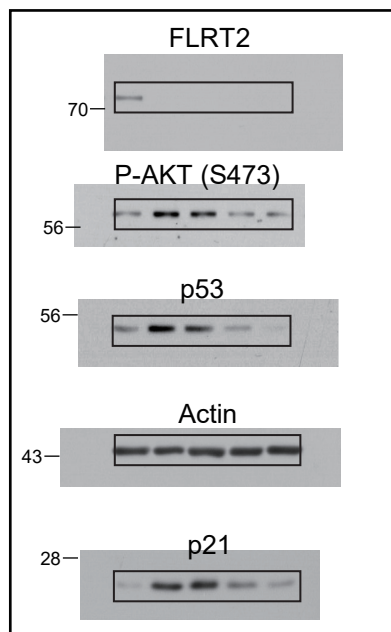

# Full unedited gel for Figure 4.

Fig. 4F

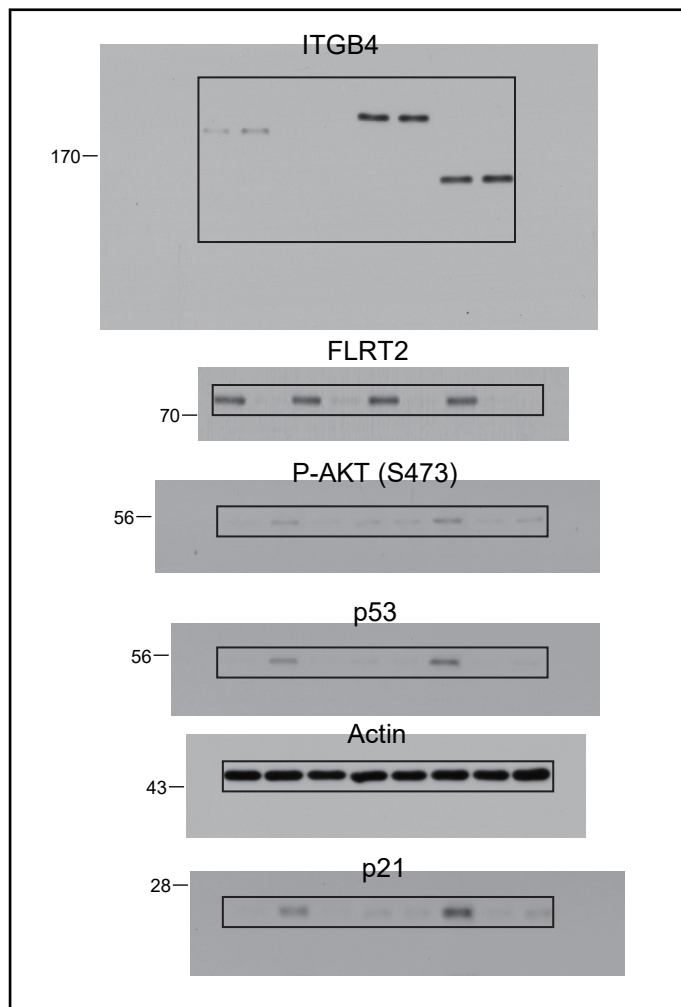

Fig. 4G

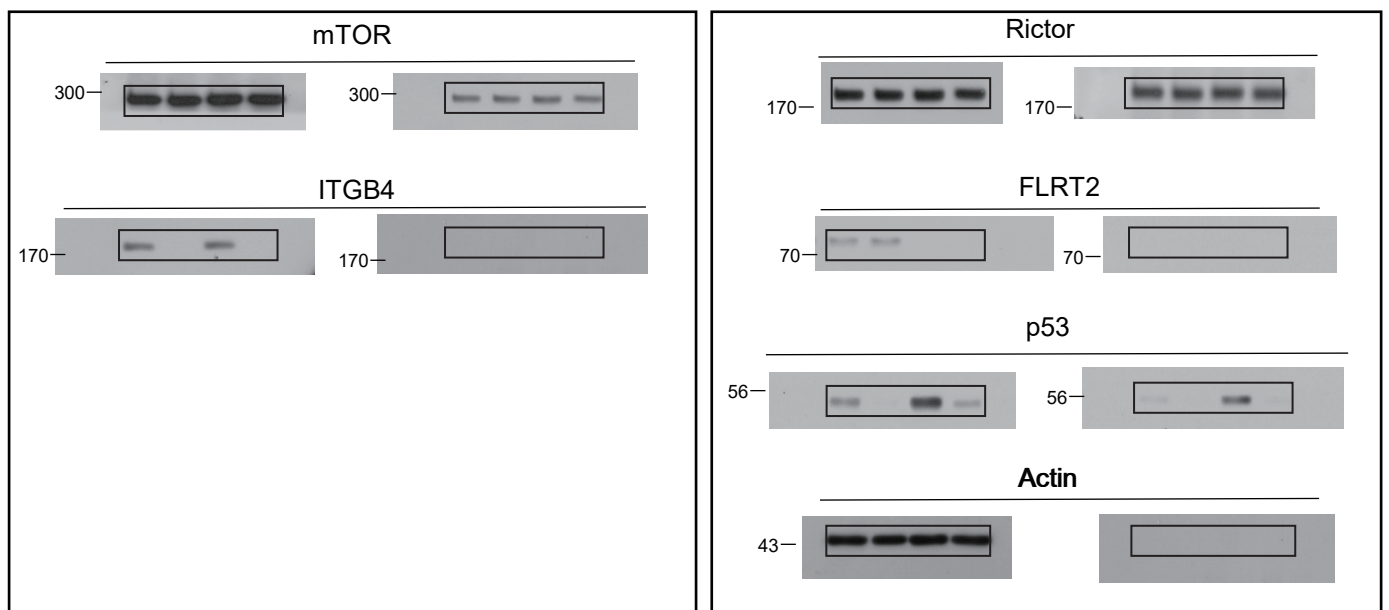

Full unedited gel for Figure 5.

Fig. 5A

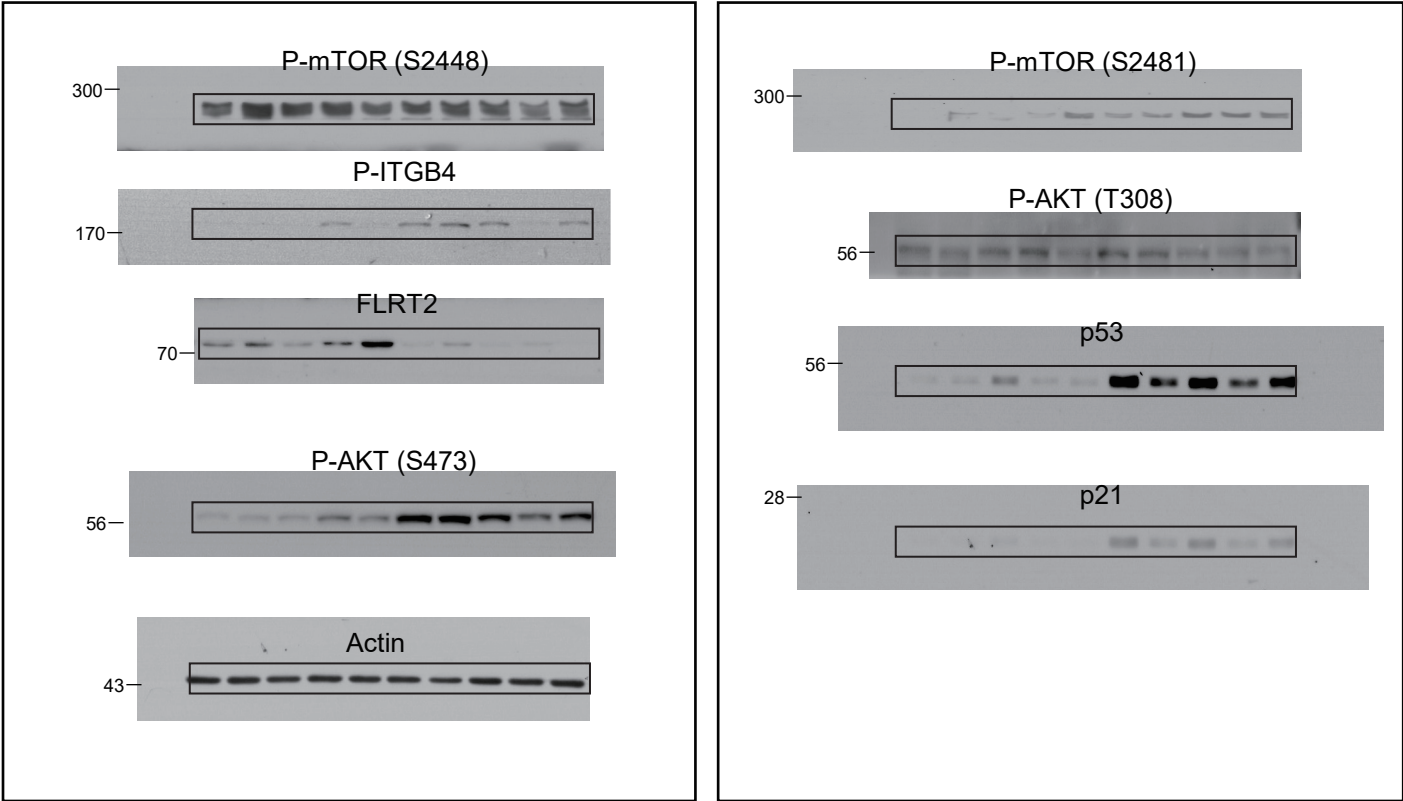

Full unedited gel for Figure 6.

Fig. 6A

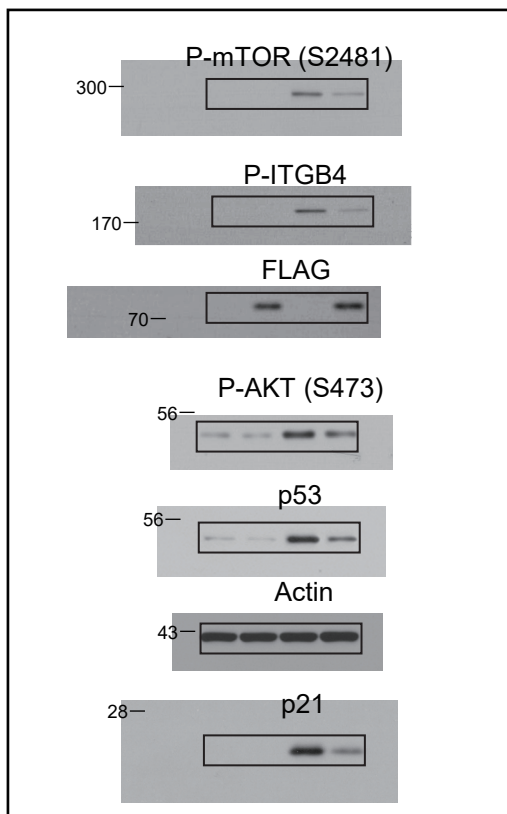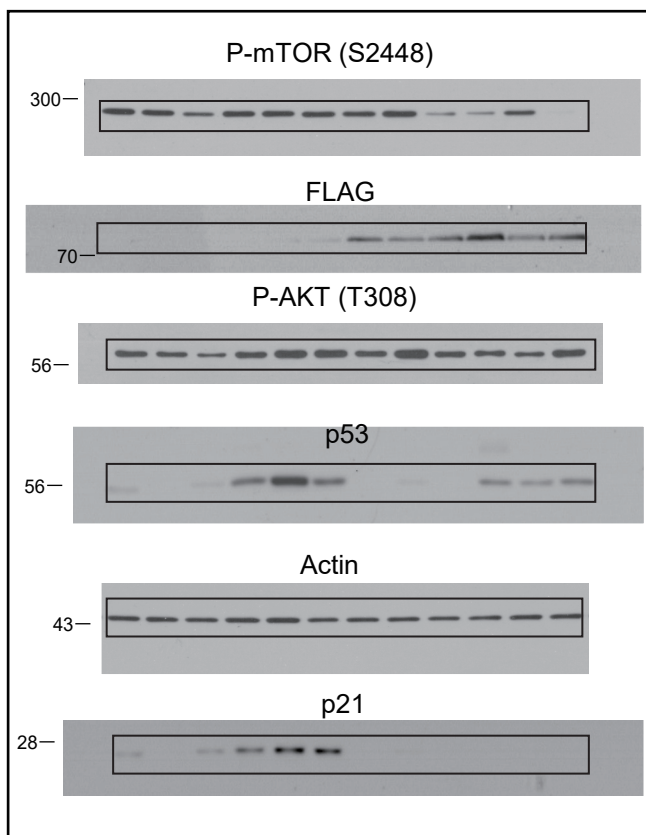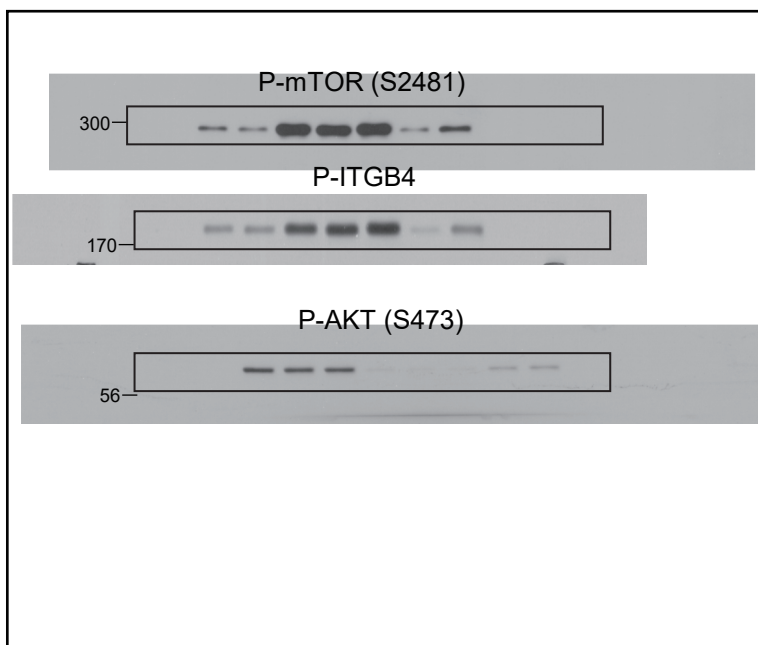

## Full unedited gel for Supplementary Figure 5.

Supplementary Figure 5A

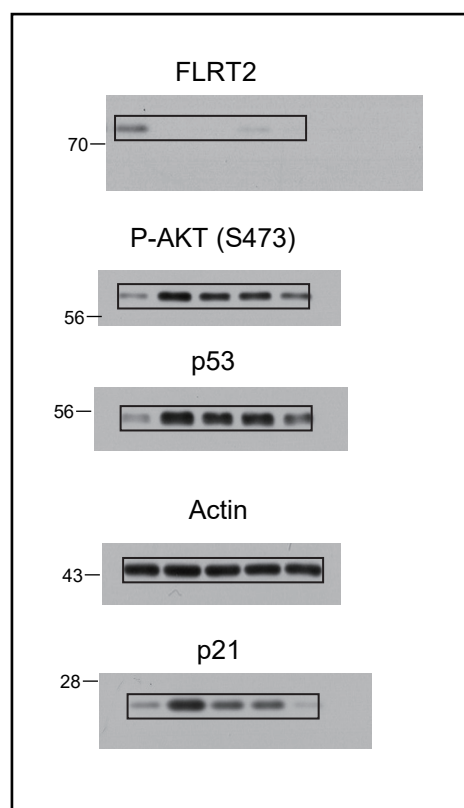

**Full unedited gel for Supplementary Figure 6.**

Supplementary Figure 6B

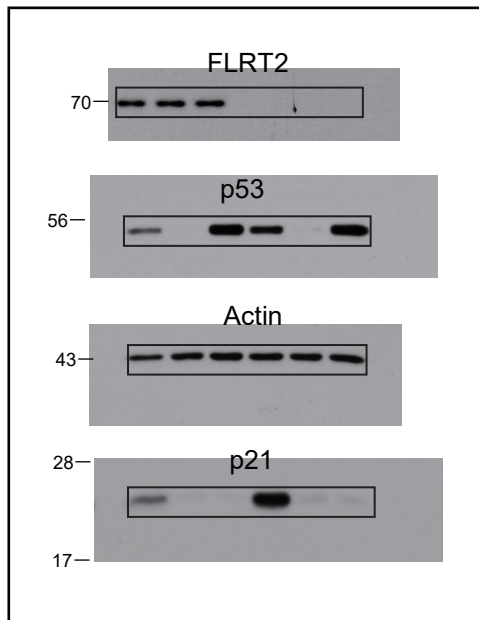



## Full unedited gel for Supplementary Figure 7.

Supplementary Figure 7A

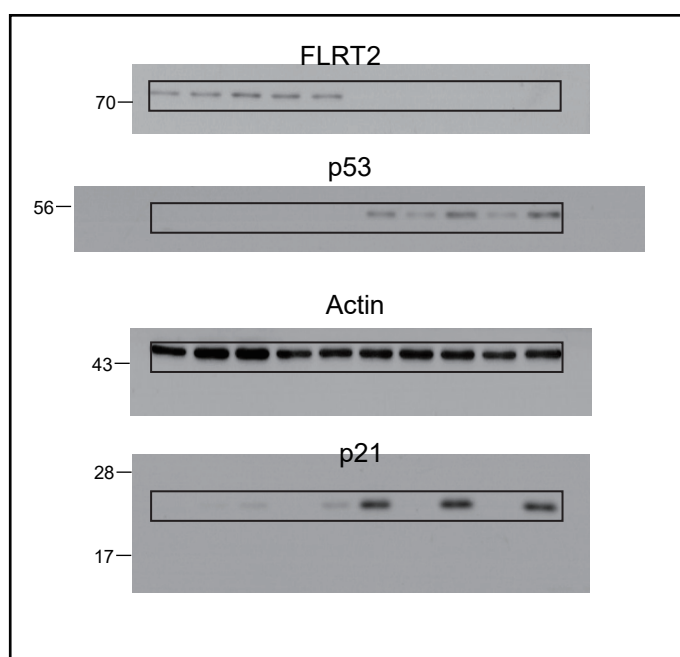

Full unedited gel for Supplementary Figure 9.

Supplementary Figure 9B

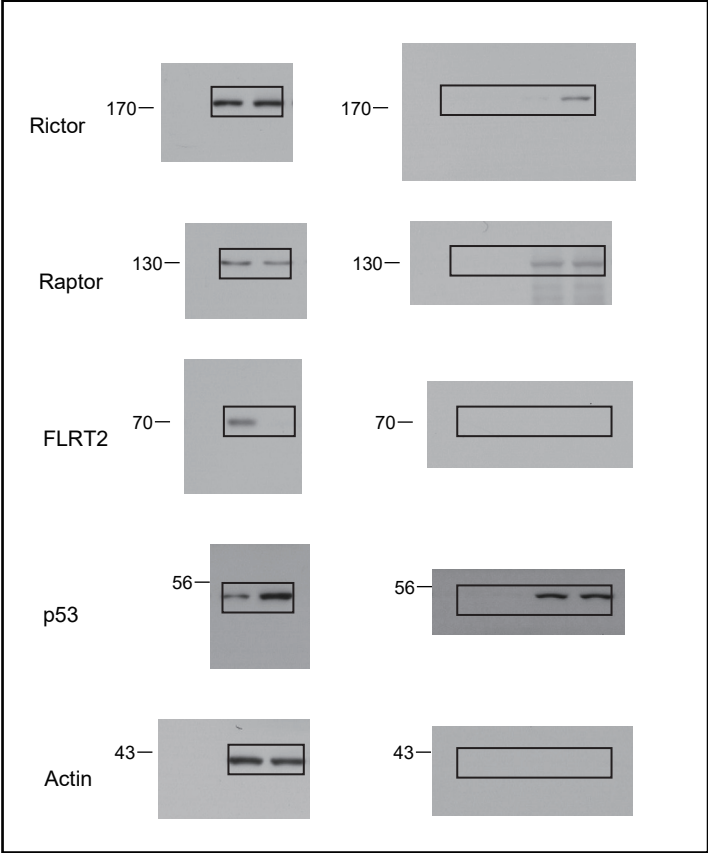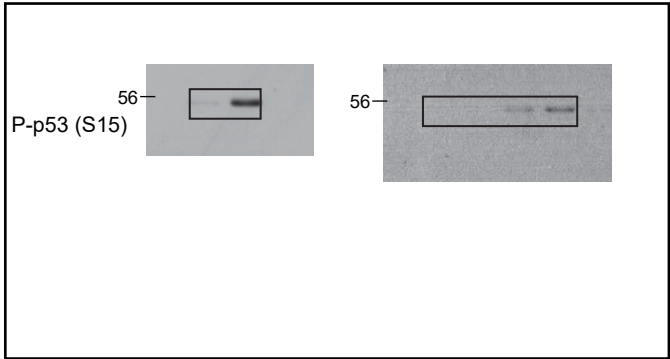

# Full unedited gel for Supplementary Figure 10

## Supplementary Figure 10C

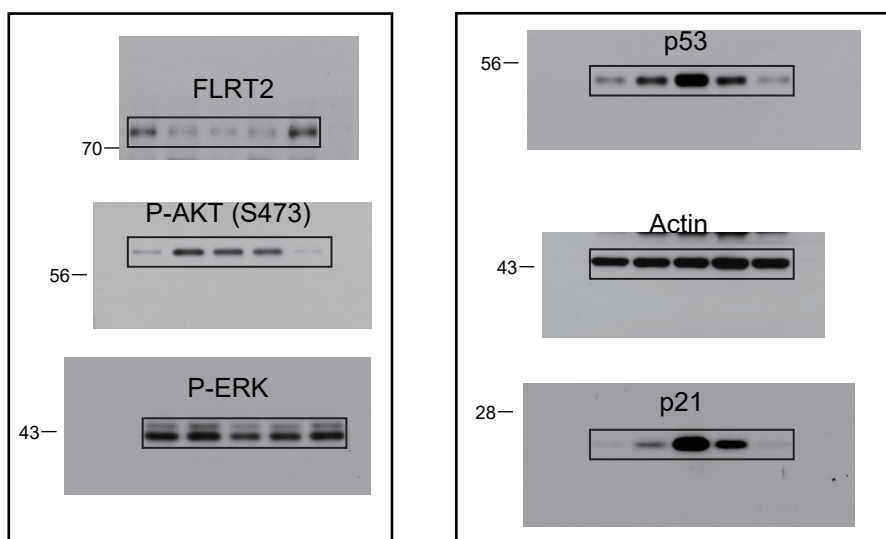

## Supplementary Figure 10D

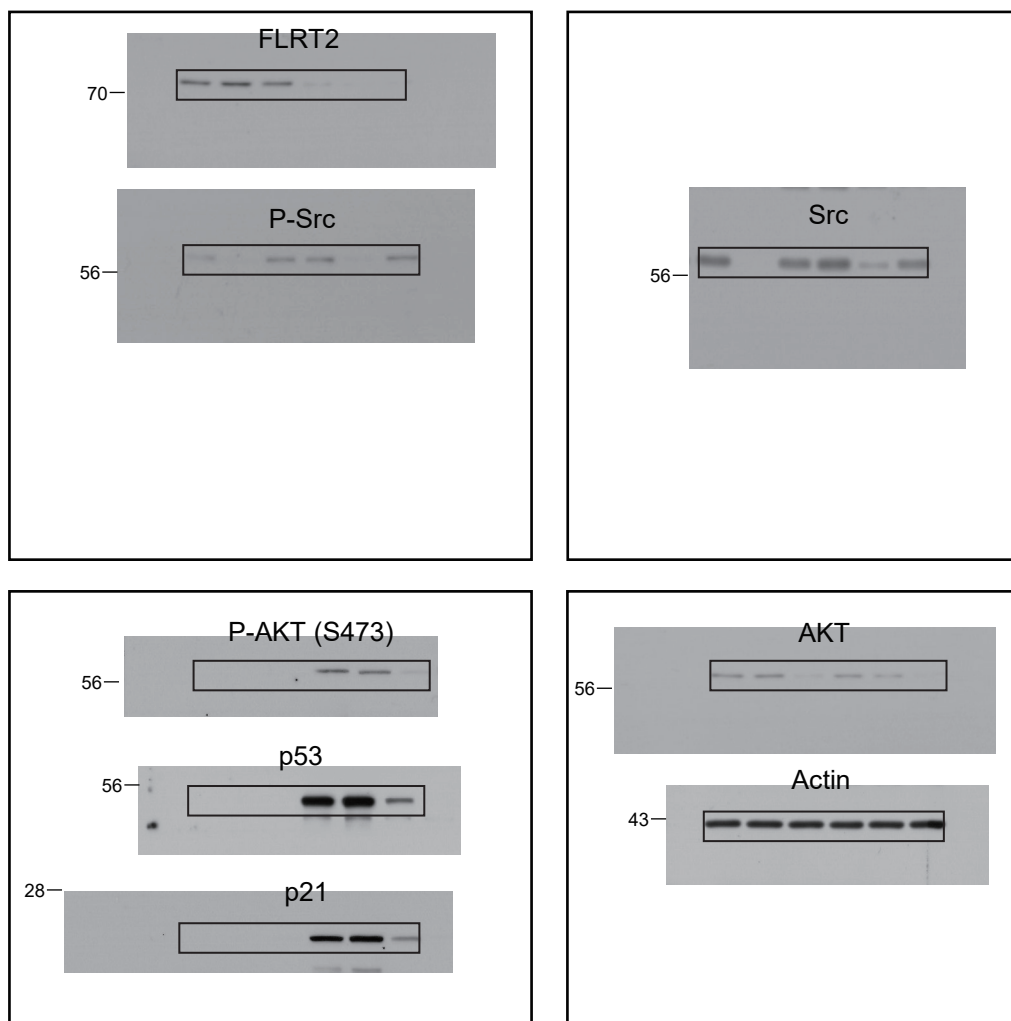

Full unedited gel for Supplementary Figure 13.

Supplementary Figure 13A

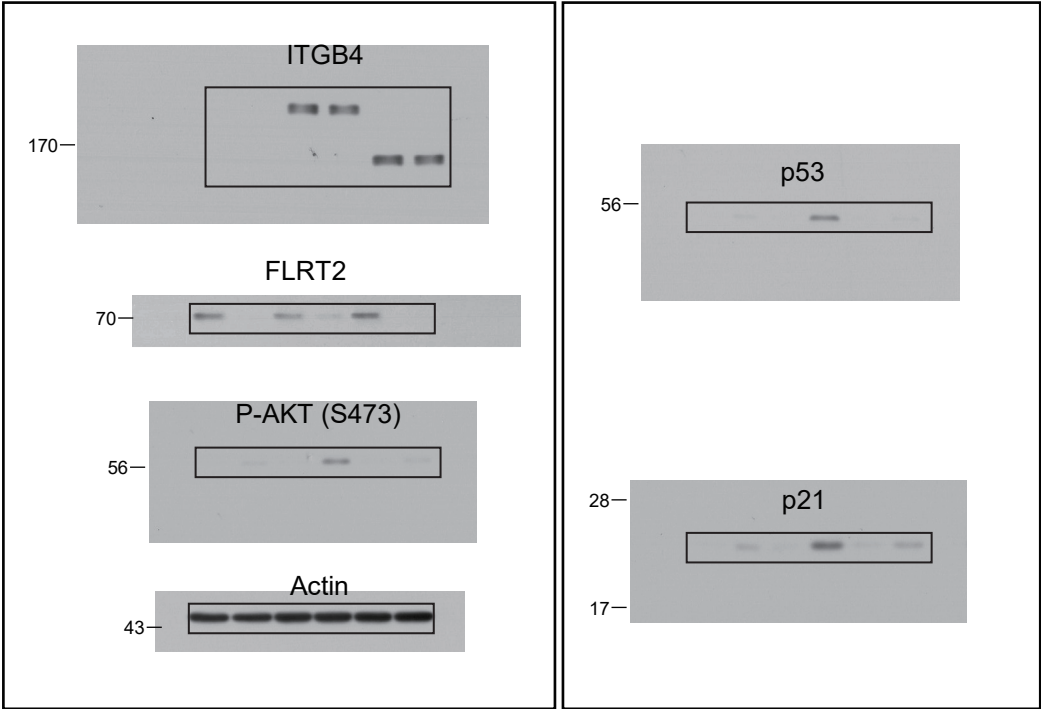

**Full unedited gel for Supplementary Figure 15.**

Supplementary Figure 15B

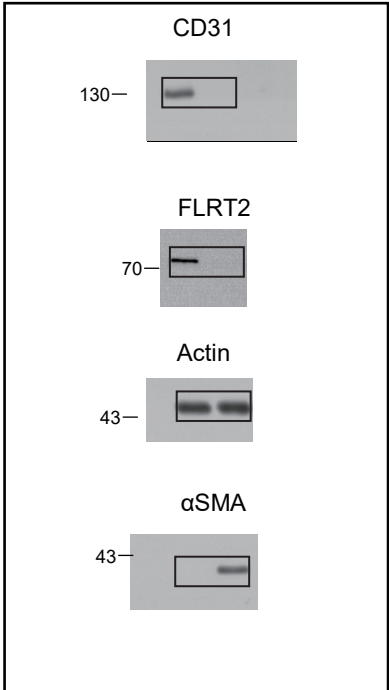

# Full unedited gel for Supplementary Figure 16.

Supplementary Figure 16A

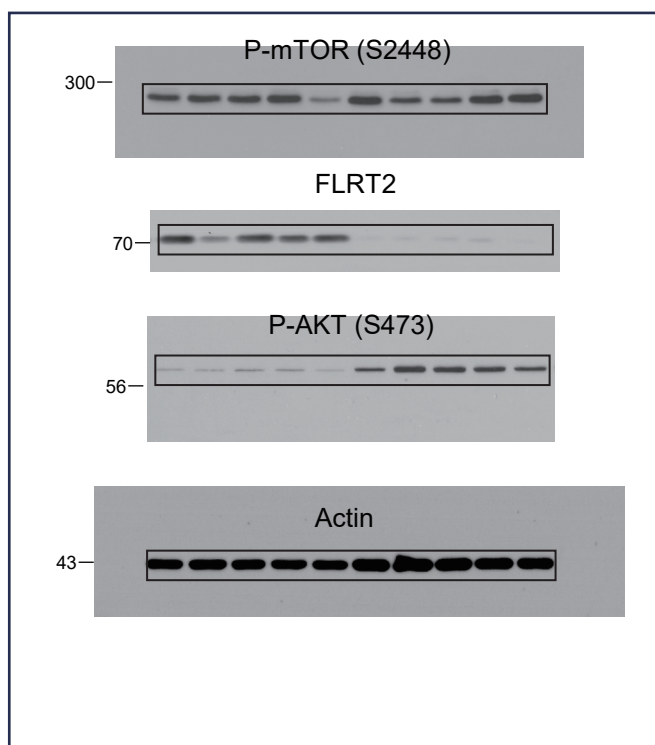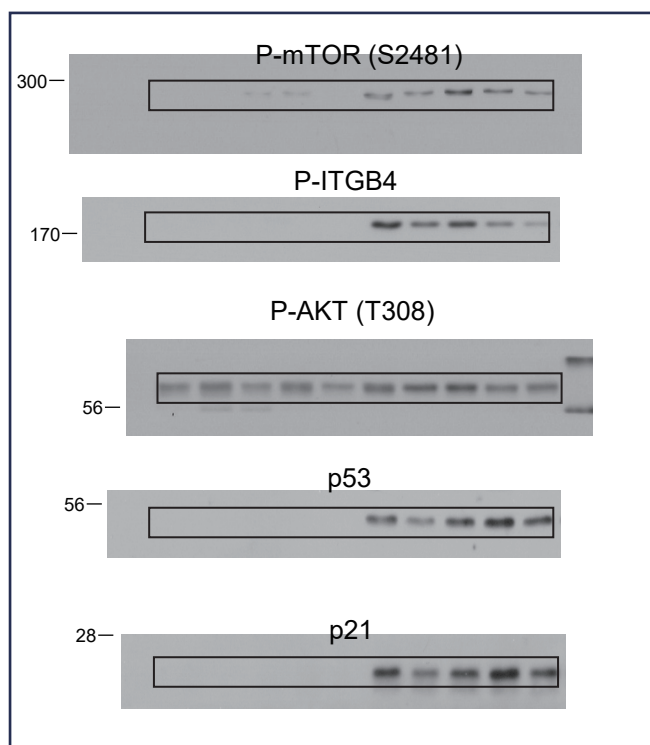

Supplement: jciinsight-9-172678-s047.pdf [file jciinsight-9-172678-s047.pdf]
